# Supplementary material
Source: MDPI journal article supplement (https://www.mdpi.com/2073-4395/13/9/2429)
Supplement: s1 [file s1]

## Supplementary Materials

Table S1. Soybean acreage (thous. ha) in 2016–2020 in the world, in Europe and in Poland (according to FAOSTAT data).

| Years              | World    | Europe | Poland |
|--------------------|----------|--------|--------|
| 2016               | 122036.5 | 5035.9 | 7.6    |
| 2017               | 125862.9 | 5760.3 | 9.3    |
| 2018               | 124051.9 | 5659.3 | 5.5    |
| 2019               | 121533.2 | 5570.3 | 7.9    |
| 2020               | 126951.5 | 5294.2 | 7.2    |
| Mean for 2016–2020 | 124087.2 | 5464.0 | 7.5    |

Table S2. Soybean harvest (thous. tone) in 2016–2020 in the world, in Europe and in Poland (according to FAOSTAT data).

| Years              | World    | Europe  | Poland |
|--------------------|----------|---------|--------|
| 2016               | 335944.7 | 10543.4 | 14.7   |
| 2017               | 359510.9 | 10721.9 | 20.3   |
| 2018               | 344731.7 | 12130.9 | 10.4   |
| 2019               | 336329.4 | 11666.4 | 15.5   |
| 2020               | 353463.7 | 10626.6 | 14.9   |
| Mean for 2016–2020 | 345996.1 | 11137.8 | 15.2   |

Table S3. Soybean yields (t ha<sup>-1</sup>) in 2016–2020 in the world, in Europe and in Poland (according to FAOSTAT data).

| Years              | World | Europe | Poland |
|--------------------|-------|--------|--------|
| 2016               | 2.75  | 2.09   | 1.93   |
| 2017               | 2.86  | 1.86   | 2.17   |
| 2018               | 2.78  | 2.14   | 1.90   |
| 2019               | 2.77  | 2.09   | 1.96   |
| 2020               | 2.78  | 2.01   | 2.08   |
| Mean for 2016–2020 | 2.79  | 2.04   | 2.00   |

Table S4. Water use efficiency in the case of irrigation of soybean crops in central Poland.

| Author                   | Years     | Cultivar       | Water use efficiency (kg ha <sup>-1</sup> mm <sup>-1</sup> ) |
|--------------------------|-----------|----------------|--------------------------------------------------------------|
| Dudek et al. (2019) [52] | 2013–2014 | Aldana, Merlin | 7.8                                                          |
| Kropkowski (2023) [71]   | 2015–2018 | Aldana, Merlin | 7.9–11.7                                                     |
